# Supplementary material for: Assessment of Health Claims Related to Folic Acid in Food Supplements for Pregnant Women According to the European Regulation
Source: MDPI journal article supplement (doi:10.3390/nu13030937), 2021-03-14
Supplement: s1 [file s1]

| <i>5-MTHF-monoglutamate</i>                                                                                                                                      | <i>Pteroylmonoglutamic acid</i>                                                                                                                                |
|------------------------------------------------------------------------------------------------------------------------------------------------------------------|----------------------------------------------------------------------------------------------------------------------------------------------------------------|
| <i>Equipment</i>                                                                                                                                                 | <i>Equipment</i>                                                                                                                                               |
| Pump: HPLC pump (model PU-1580; Jasco, Japan)                                                                                                                    | Pump: HPLC pump (model Concept Series PU II; MSI; United Kingdom)                                                                                              |
| Degassing: degassing system (model BG-14, GASTORR; Flom Corporation, Japan)                                                                                      | Injector: auto-sampler (model AS-1555-10; Jasco, Japan)                                                                                                        |
| Injector: auto-sampler (model AS-950; Jasco, Japan)                                                                                                              | Detector: UV-visible detector (Spectra Series UV100; Thermo Separation Products, United States)                                                                |
| Detector: fluorescence detector (model FP-2020 Plus, Jasco, Japan)                                                                                               | Column: LiChrospher® 100 RP-18 endcapped (5 µm; LiChroCART® 250-4 HPLC-Cartridge; Merck, Darmstadt, Germany)                                                   |
| Column: LiChrospher® 100 RP-18 endcapped (5 µm; LiChroCART® 250-4 HPLC-Cartridge; Merck, Darmstadt, Germany)                                                     | Software: CromaNec XP (Micronec, Spain)                                                                                                                        |
| Software: CromaNec XP (Micronec, Spain)                                                                                                                          |                                                                                                                                                                |
| <i>Conditions</i>                                                                                                                                                | <i>Conditions</i>                                                                                                                                              |
| Room temperature                                                                                                                                                 | Room temperature                                                                                                                                               |
| Mobile phase (A:B, 94:6): Solvent A: NaH <sub>2</sub> PO <sub>4</sub> · 2H <sub>2</sub> O (100 mM, pH = 4.4); Solvent B: acetonitrile for fluorescence detection | Mobile phase (A:B, 94:6); Solvent A: NaH <sub>2</sub> PO <sub>4</sub> · 2H <sub>2</sub> O (100 mM, pH = 4.4); Solvent B: acetonitrile for UV-visible detection |
| Flux: 1 mL/min (isocratic conditions)                                                                                                                            | Flux: 1 mL/min (isocratic conditions)                                                                                                                          |

**Figure S1.** Chromatographic equipment and HPLC conditions used in this study for the determination of folic acid vitamers.

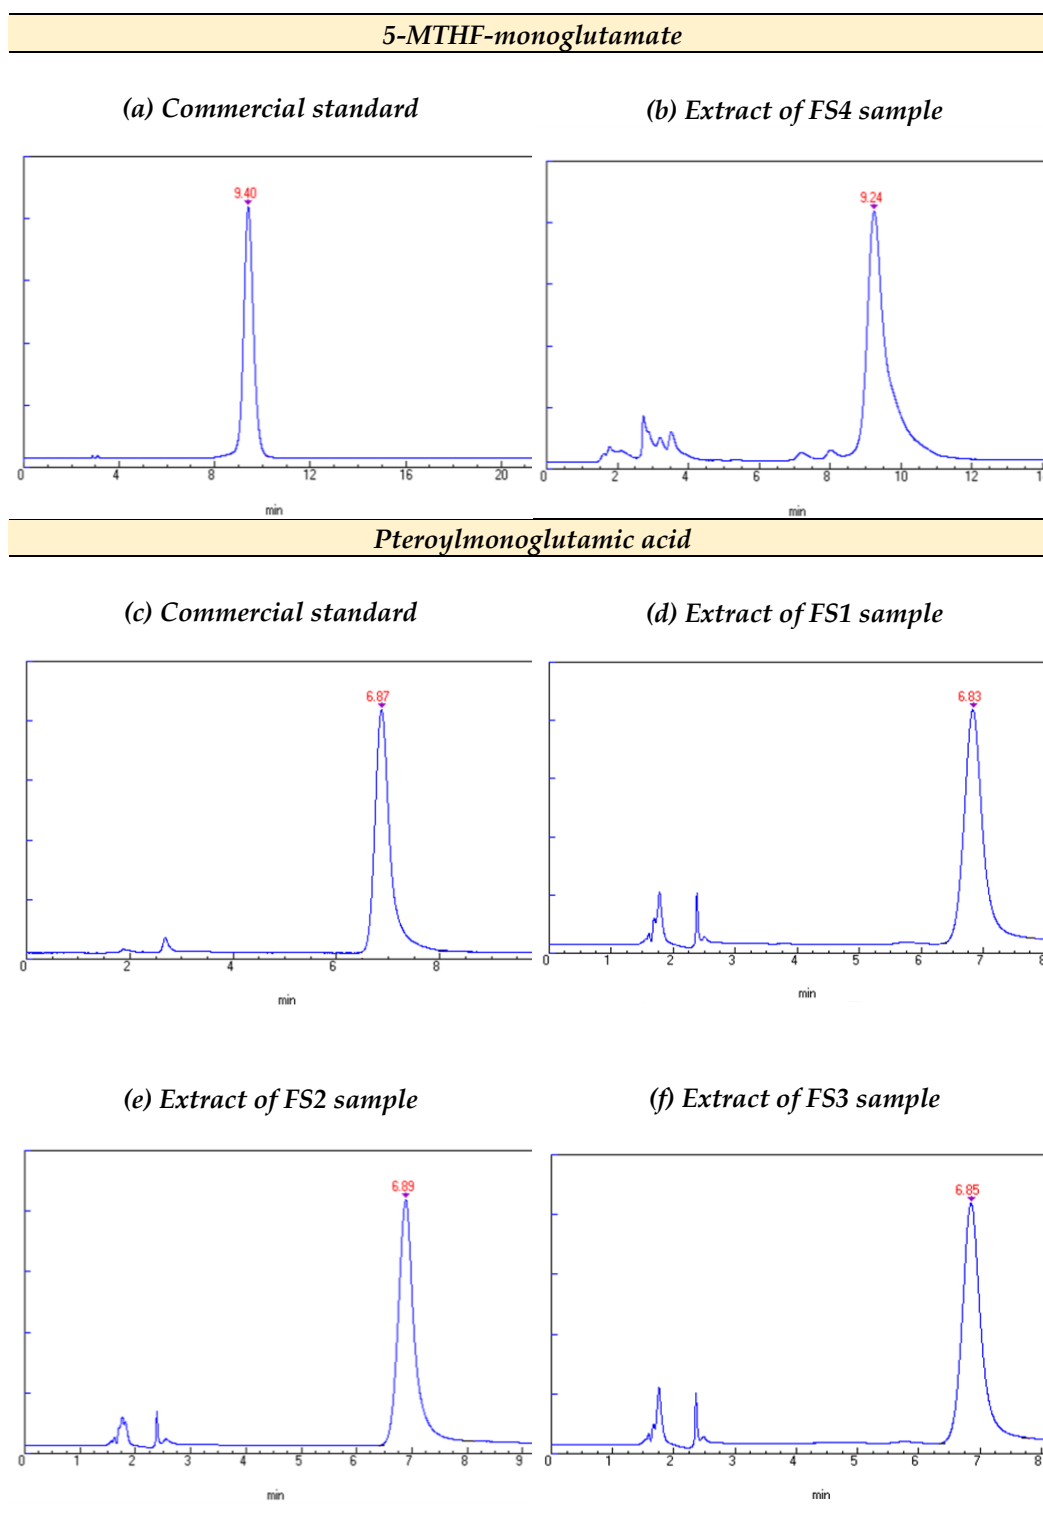

**Figure S2.** Chromatograms obtained for 5-MTHF-monoglutamate (measured by HPLC-fluorescence) and pteroylmonoglutamic acid (measured by HPLC-UV): (a) Commercial standard of 5-MTHF-monoglutamate; (b) Extract of FS4 sample containing 5-MTHF-monoglutamate; (c) Commercial standard of pteroylmonoglutamic acid; (d) Extract of FS1 sample containing pteroylmonoglutamic acid; (e) Extract of FS2 sample containing pteroylmonoglutamic acid; (f) Extract of FS3 sample containing pteroylmonoglutamic acid. Chromatographic conditions: see Figure S1.

**Table S1.** Designed template used to compile information from Spanish market research.

| <b>Food supplement product</b> | <b>Source</b>  | <b>Does it contain folic acid?</b> | <b>Is it directed to pregnant women?</b> | <b>Does it include folic acid health-related claims?</b> | <b>Does it include other health claims related to vitamins and minerals?</b> | <b>Comments/remarks</b> |
|--------------------------------|----------------|------------------------------------|------------------------------------------|----------------------------------------------------------|------------------------------------------------------------------------------|-------------------------|
|                                | In situ/Online | YES/NO                             | YES/NO                                   | YES/NO                                                   | YES/NO                                                                       |                         |
